# Supplementary material for: The Straw That Broke the Camel’s Back: Natural Variations in 17β-Estradiol and COMT-Val158Met Genotype Interact in the Modulation of Model-Free and Model-Based Control
Source: Front Behav Neurosci. 2021 Jul 8;15:658769. doi: 10.3389/fnbeh.2021.658769 (PMC8297616; doi:10.3389/fnbeh.2021.658769)
Supplement: Supplementary file 1 [file Data_Sheet_1.XLSX]

## Sheet: Data_DiekhofEtAl_MBMF_Cycle
ID	Age_years	Testsequence_12early.late_21late.early	Drifttype_EarlyFollicularPhase	Drifttype_LateFollicularPhase	COMTrs4680_RawAlleles_Met.A_Val.G	COMTrs4680_Genotypes_MetMet.0_ValCarriers.1	Estradiol_earlyF_pg.ml	Estradiol_lateF_pg.ml	EarlyF_drift_rare_no.reward	EarlyF_drift_rare_reward	EarlyF_drift_common_no.reward	EarlyF_drift_common_reward	EarlyF_drift_Model_Free_Score	EarlyF_drift_Model_Based_Score	LateF_drift_rare_no.reward	LateF_drift_rare_reward	LateF_drift_common_no.reward	LateF_drift_common_reward	LateF_drift_Model_Free_Score	LateF_drift_Model_Based_Score	Delta_drift_ModelFreeScore_LateFminusEarlyF	Delta_drift_ModelBasedScore_LateFminusEarlyF	EarlyF_drift_absoluteGain_inPoints	LateF_drift_absoluteGain_inPoints	Delta_drift_absoluteGain_LateFminusEarlyF	EarlyF_stable_rare_no.reward	EarlyF_stable_rare_reward	EarlyF_stable_common_no.reward	EarlyF_stable_common_reward	EarlyF_stable_Model_Free_Score	EarlyF_stable_Model_Based_Score	LateF_stable_rare_no.reward	LateF_stable_rare_reward	LateF_stable_common_no.reward	LateF_stable_common_reward	LateF_stable_Model_Free_Score	LateF_stable_Model_Based_Score	Delta_stable_ModelFreeScore_LateFminusEarlyF	Delta_stable_ModelBasedScore_LateFminusEarlyF	EarlyF_stable_absoluteGain_inPoints	LateF_stable_absoluteGain_inPoints	Delta_stable_absoluteGain_LateFminusEarlyF	EarlyF_alltrials_rare_no.reward	EarlyF_alltrials_common_no.reward	EarlyF_alltrials_rare_reward	EarlyF_alltrials_common_reward	EarlyF_alltrials_Model_Free_Score	EarlyF_alltrials_Model_Based_Score	LateF_alltrials_rare_no.reward
37	22	21	3	2	AA	0	1.128	2.531	40	66.6667	49.1525	37.5	15.0141	-38.3192	57.1429	65	55.1724	46.9388	-0.376495	-16.0908	-15.3906	22.2284	60	69	9	54.5455	50	42	55.5556	9.0101	18.101	55	40	51.2195	39.6552	-26.5643	3.43566	-35.5744	-14.6653	78	86	8	46.1538	45.8716	55.5556	47.0588	10.589	-8.21445	56.0976
39	24	12	4	4	AA	0	2.146	4.161	83.3333	80	82.0513	98.4127	13.0281	19.6947	100	95.8333	76.3158	85.9375	5.45504	13.7884	-7.57304	-5.90637	84	88	4	85	79.1667	70	82.1429	6.30952	17.9762	90	90.3226	70	73.913	4.23562	3.59046	-2.0739	-14.3857	79	101	22	84.2105	75.2809	79.5918	90.7563	10.8567	20.0941	96.9697
49	27	12	1	4	AA	0	2.384	2.181	100	95.4545	86.8421	98.3871	6.99954	16.0904	90	96.6667	94.7368	100	11.9298	-1.40351	4.93029	-17.494	84	91	7	100	96.2963	94.1176	100	2.17865	9.58606	95.6522	81.8182	83.7209	96.7742	-0.780729	26.8873	-2.95938	17.3012	86	85	-1	100	91.0112	95.9184	99.1736	4.08069	12.244	93.0233
50		12	3	1	AA	0	1.757	3.231	64.5161	57.1429	69.7674	79.3103	2.16963	16.9162	58.8235	62.5	72.9167	76.7857	7.54552	0.192577	5.37589	-16.7236	69	78	9	58.8235	76.9231	69.2308	79.2453	28.1141	-8.08503	83.3333	88	85.1064	93.3333	12.8936	3.56028	-15.2204	11.6453	79	85	6	62.5	69.4737	70	79.2793	17.3056	2.3056	71.4286
33	26	21	1	1	AA	0	5.423	3.476	94.1176	100	87.7551	100	18.1273	6.36255	68.4211	84.2105	80.7018	91.8367	26.9245	-4.65449	8.7972	-11.017	82	66	-16	88.2353	100	95.5556	98.4127	14.6218	-8.90756	79.1667	96.2963	90.9091	98.1818	24.4024	-9.8569	9.78051	-0.949339	89	81	-8	91.1765	91.4894	100	99.2126	16.5468	-1.10029	74.4186
45	26	12	1	3	AA	0	4.723	4.673	73.0769	83.3333	69.7674	95.5224	36.0114	15.4985	70.8333	100	74.5098	91.3043	45.9612	-12.3721	9.94985	-27.8707	77	75	-2	90.4762	96.1538	68.2927	94.9153	32.3002	20.9449	89.4737	95.4545	93.0233	100	12.9576	0.995883	-19.3426	-19.949	84	88	4	80.8511	69.0476	92.1053	95.2381	37.4447	14.9363	79.0698
16	29	12	1	3	AA	0	7.662	8.594	86.3636	66.6667	61.3636	76.9231	-4.13753	35.2564	77.7778	84.6154	78.3333	81.6327	10.1369	-3.53829	14.2745	-38.7947	80	61	-19	61.9048	65.3846	56.0976	87.0968	34.4791	27.5194	93.3333	82.6087	71.0526	97.2603	15.483	36.9323	-18.9961	9.41292	89	95	6	74.4186	58.8235	66.0714	82.4561	15.2854	31.9798	83.3333
47	26	21	4	4	AA	0			50	36.6667	72.7273	53.7037	-32.3569	-5.69024	83.3333	73.0769	69.3878	64.1509	-15.4932	5.0196	16.8637	10.7098	85	77	-8	71.4286	73.0769	40.3509	46.6667	7.96414	4.66744	54.5455	37.931	71.1111	76.6667	-11.0589	22.17	-19.023	17.5025	71	85	14	60.9756	54.4554	53.5714	50.5051	-11.3546	3.45379	72.4138
9	27	12	1	1	AA	0	1.205	1.656	83.3333	72	61.7021	77.9661	4.93064	27.5973	80	92	62.5	73.2143	22.7143	-1.28571	17.7836	-28.883	85	82	-3	64.7059	57.6923	62	78.5714	9.55785	23.585	65.3846	80.7692	65.1163	70.9091	21.1774	-9.5918	11.6196	-33.1768	80	80	0	74.2857	61.8557	64.7059	78.2609	6.82537	25.985	71.7391
10	30	12	2	4	AA	0	2.552	3.65	68.9655	75	65.9091	81.8182	21.9436	9.87461	75	96.6667	72.093	94.5455	44.1191	0.785765	22.1755	-9.08884	74	85	11	53.3333	83.3333	72	71.2121	29.2121	-30.7879	78.5714	96	97.561	98.5075	18.3751	-16.4821	-10.8371	14.3058	84	90	6	63.6364	69.1489	78.9474	76.0331	22.1951	-8.42688	76.4706
26	29	12	1	2	AA	0	2.327	5.592	86.3636	90	65.9091	84.6154	22.3427	15.0699	51.7241	73.3333	51.2195	78.3333	48.723	5.50463	26.3804	-9.5653	81	74	-7	65.3846	96	67.5676	93.3333	56.3812	-4.84962	68.1818	82.3529	50	79.5455	43.7166	15.3743	-12.6646	20.224	82	60	-22	75	66.6667	92.7273	89.2857	40.3463	4.89177	58.8235
13	26	21	4	1	AA	0	1.439	2.127	100	68.5714	81.3953	94.7368	-18.0871	44.7701	76.4706	78.2609	68	94.9153	28.7055	25.125	46.7926	-19.6451	92	83	-9	68.1818	68	61.7021	76.7857	14.9018	15.2654	88.2353	46.1538	65.9091	93.4426	-14.5479	69.615	-29.4497	54.3496	80	86	6	80.5556	71.1111	68.3333	85.8407	2.50737	26.9518	82.3529
3	26	12	3	2	GA	1	5.057	3.868	50	84.2105	58.4906	48.8889	24.6088	-43.8122	35	31.25	52.8302	40	-16.5802	-9.08019	-41.189	34.732	64	76	12	41.9355	42.3077	34.7826	51.0638	16.6534	15.909	47.0588	54.1667	58.8235	57.8947	6.17905	-8.03664	-10.4744	-23.9456	72	80	8	46.0317	47.4747	60	50	16.4935	-11.443	40.5405
4	20	21	4	4	GA	1	4.611	3.115	77.7778	85.7143	64.7059	96.0784	39.3091	23.436	77.2727	60.8696	56	83.3333	10.9302	43.7365	-28.3789	20.3005	79	76	-3	100	100	86.8421	94.0299	7.18775	7.18775	86.3636	88.5714	75.6757	96.2264	22.7585	18.3429	15.5708	11.1552	100	86	-14	86.2069	74.1573	93.5484	94.9153	28.0994	13.4165	81.8182
32	22	12	3	4	GA	1	3.263	4.987	75	85.7143	68.1818	90.2439	32.7764	11.3478	92.3077	96.6667	89.0909	90.1961	5.46414	-3.25381	-27.3122	-14.6016	61	80	19	66.6667	88	77.0833	86.2745	30.5245	-12.1422	87.5	96.6667	75.9259	96	29.2407	10.9074	-1.28377	23.0496	76	81	5	70.4545	71.9298	86.9565	88.0435	32.6156	-0.388323	89.6552
28	20	12	1	1	GA	1	2.323	3.566	66.6667	75	68.6275	87.5	27.2059	10.5392	80	70.5882	64	87.0968	13.685	32.5085	-13.5209	21.9693	75	78	3	88.2353	86.2069	85.4167	94.4444	6.99938	11.0562	90.4762	73.913	69.0909	92.1569	6.50281	39.6291	-0.496574	28.5729	83	75	-8	76.3158	76.7677	81.6327	90.9091	19.4583	8.82455	85.3659
12	21	21	4	2	GG	1	1.679	5.352	75	73.0769	56	87.7193	29.7962	33.6424	69.2308	70	75.5556	91.0714	16.2851	14.7466	-13.5111	-18.8957	83	75	-8	87.5	61.5385	69.0476	83.3333	-11.6758	40.2473	70	77.7778	64.1026	85.7143	29.3895	13.8339	41.0653	-26.4133	92	90	-2	81.25	61.9565	67.3077	85.3659	9.46702	37.3516	69.5652
43	25	12	2	3	GA	1	1.771	2.162	95.6522	100	87.7551	94.5455	11.1382	2.44253	100	100	98.5075	97.619	-0.888415	-0.888415	-12.0266	-3.33094	76	63	-13	91.6667	95.2381	88.1356	100	15.4358	8.29298	93.3333	97.1429	95.9184	98.0392	5.93037	-1.68868	-9.50546	-9.98165	67	87	20	93.617	87.963	97.619	97.0297	13.0688	5.06471	96.9697
51	25	12	2	4	GA	1	5.139	7.104	52	56.25	52.0833	51.7857	3.95238	-4.54762	54.5455	50	54.2373	53.0612	-5.72152	3.36939	-9.6739	7.91701	71	68	-3	45.4545	59.2593	46.6667	41.1765	8.31452	-19.2949	50	42.3077	29.6296	50.9804	13.6585	29.0431	5.34394	48.338	76	76	0	48.9362	49.4624	58.1395	46.729	6.46997	-11.9368	52.5
42	25	12	1	2	GG	1	5.211	5.257	75	95	91.4894	93.5484	22.059	-17.941	75	79.1667	78	87.037	13.2037	4.87037	-8.85532	22.8113	82	79	-3	90	100	86.3636	93.3333	16.9697	-3.0303	80.9524	78.9474	80	87.8378	5.83283	9.84285	-11.1369	12.8732	87	92	5	82.5	89.011	97.8261	93.4426	19.7577	-10.8945	78.0488
40	25	12	1	4	GA	1	2.936	7.871	35	51.8519	55.102	62.2642	24.014	-9.68974	60	48	24.3902	52.381	15.9907	39.9907	-8.02325	49.6805	80	89	9	57.1429	53.3333	54.717	57.377	-1.14946	6.46959	38.4615	67.8571	50	40.9836	20.3792	-38.412	21.5287	-44.8816	76	88	12	46.3415	54.902	52.381	59.6491	10.7867	-1.29233	51.5152
38	21	21	1	4	GA	1	2.144	3.214	58.8235	80	52.5	65	33.6765	-8.67647	58.8235	63.3333	61.9048	83.3333	25.9384	16.9188	-7.7381	25.5952	75	89	14	68.1818	73.913	58.8235	77.7778	24.6855	13.223	93.3333	81.8182	57.1429	91.4286	22.7706	45.8009	-1.91491	32.5778	78	92	14	62.5	56.044	77.5862	72.3404	31.3827	1.21026	75
15	23	12	1	2	GA	1	2.345	5.553	66.6667	64.7059	70	87.2727	15.3119	19.2335	66.6667	56.5217	46	63.7931	7.64818	27.938	-7.66377	8.70452	71	80	9	73.0769	72.2222	61.7021	93.1034	30.5466	32.256	65	72	69.2308	87.8788	25.648	11.648	-4.8986	-20.608	75	92	17	70	65.9794	68.5714	90.2655	22.8575	25.7147	65.7895
7	26	12	1	1	GA	1	3.906	3.64	36.3636	50	52.8302	54.1667	14.9728	-12.2999	55	61.1111	54.3478	59.6491	11.4124	-0.809814	-3.56043	11.4901	62	70	8	50	71.4286	53.0612	55.3571	23.7245	-19.1327	50	72.7273	58.4906	85.1852	49.4219	3.96735	25.6974	23.1	75	75	0	43.1818	52.9412	61.5385	54.8077	20.2232	-16.4901	52.5
48	27	12	2	4	GG	1	3.532	5.527	72.2222	77.7778	70.8333	84.375	19.0972	7.98611	83.3333	90	79.5455	89.0625	16.1837	2.85038	-2.91351	-5.13573	81	82	1	68.4211	80.9524	67.5676	87.5	32.4638	7.4011	71.4286	75	60.4651	87.931	31.0373	23.8945	-1.42641	16.4934	94	72	-22	70.2703	69.4118	79.4872	86.0294	25.8346	7.40074	76.087
5	21	21	2	1	GA	1	1.201	8.079	93.75	90.9091	71.7949	91.5493	16.9135	22.5953	86.2069	94.4444	83.7209	93.1034	17.6201	1.14497	0.706551	-21.4504	93	77	-16	100	89.4737	84.0909	98.3871	3.76987	24.8225	85.1852	100	71.1538	94	37.661	8.03134	33.8911	-16.7912	81	71	-10	97.561	78.3133	90.2439	94.7368	9.10652	23.7407	85.7143
27	27	12	3	3	GA	1	2.337	3.381	57.1429	38.8889	50.8772	67.3913	-1.73986	34.7681	39.3939	57.8947	57.4468	40	1.05399	-35.9476	2.79385	-70.7157	64	69	5	63.6364	43.75	46.3415	72.8571	6.62932	46.402	61.5385	65.2174	33.3333	50	20.3456	12.9877	13.7163	-33.4143	85	72	-13	60	48.9796	41.1765	70.6897	2.88653	40.5336	49.1525
18	26	12	4	2	GA	1	2.184	4.037	78.9474	83.3333	65.2174	83.9286	23.0971	14.3252	79.1667	92.8571	77.5862	90.566	26.6703	-0.710645	3.57316	-15.0359	79	67	-12	82.6087	100	68.8889	94.4444	42.9469	8.16425	82.3529	73.913	76.1905	77.9412	-6.6892	10.1906	-49.6361	2.02635	81	90	9	80.9524	67.033	92.1569	89.0909	33.2624	10.8535	80.4878
46	23	21	3	2	GA	1	3.08	5.629	100	100	85.1852	91.4894	6.30418	6.30418	61.1111	76.1905	79.2453	80.3571	16.1912	-13.9675	9.88705	-20.2717	73	78	5	100	95.4545	81.3953	89.7059	3.76508	12.856	81.8182	90.9091	84.0909	96.7742	21.7742	3.59238	18.0091	-9.26361	89	84	-5	100	83.5052	97.8723	90.4348	4.80197	9.05729	72.5
30	26	21	4	4	GA	1	2.902	5.47	45.4545	72.7273	61.9048	90.1639	55.5319	0.986445	55.1724	73.913	42.1053	89.2857	65.9211	28.4398	10.3892	27.4534	94	79	-15	50	68.75	58.9744	86.6667	46.4423	8.94231	66.6667	86.9565	71.4286	96.8254	45.6867	5.10697	-0.755627	-3.83534	90	86	-4	48.1481	60.4938	70.7692	88.4298	50.557	5.31484	59.0909
22	22	12	1	4	GA	1	1.453	1.561	90.9091	96.2963	90.6977	94.6429	9.33239	-1.44202	62.5	77.2727	68.0851	75	21.6876	-7.85783	12.3552	-6.41581	84	85	1	94.4444	100	98.0392	100	7.51634	-3.59477	60	47.0588	42.5926	60.3448	4.81106	30.6934	-2.70528	34.2882	81	74	-7	92.5	94.6809	97.8723	97.4359	8.12739	-2.61729	61.1111
2	26	21	1	2	GA	1	1.423	5.28	77.2727	85.7143	66.0377	73.913	16.3169	-0.566251	79.1667	83.3333	63.4615	92.7273	33.4324	25.0991	17.1155	25.6653	75	74	-1	77.7778	91.6667	79.4872	94.2029	28.6046	0.82683	58.8235	75	69.5652	78.1818	24.7931	-7.55987	-3.81154	-8.3867	92	87	-5	77.5	71.7391	88.4615	86.087	25.3094	3.38629	70.7317
21	29	21	2	1	GA	1			95.6522	95.6522	91.4894	82.6923	-8.79705	-8.79705	88.8889	92.3077	85.1064	91.8033	10.1157	3.27809	18.9128	12.0751	75	75	0	100	95.4545	87.8788	86.8421	-5.58214	3.50877	91.6667	90.4762	85.7143	84.9057	-1.9991	0.381851	3.58304	-3.12692	58	72	14	97.7778	89.3805	95.5556	84.4444	-7.15831	-2.71386	90.1961
6	23	12	3	3	GG	1	1.74	0.68	83.3333	100	79.1667	100	37.5	4.16667	66.6667	100	69.0909	100	64.2424	-2.42424	26.7424	-6.59091	75	70	-5	70	95.8333	86.3636	95.1613	34.631	-17.0357	75	100	62.7907	98.1818	60.3911	10.3911	25.7601	27.4268	86	83	-3	77.2727	82.6087	97.7273	97.4576	35.3035	-5.60561	70.8333
19	21	21	4	3	GA	1	3.037	6.659	95	95.4545	90.6977	95.3125	5.06937	4.16028	69.5652	85.7143	65.9574	82.6087	32.8003	0.502181	27.7309	-3.6581	87	71	-16	90.4762	100	82.9268	94.9153	21.5122	2.46462	80.6452	83.3333	82.5	93.3333	13.5215	8.14516	-7.99073	5.68055	87	77	-10	92.6829	86.9048	98.0392	95.122	13.5735	2.8609	75.9259
23	26	21	4	1	GA	1	1.88	5.213	100	76.6667	82.2222	98.2456	-7.30994	39.3567	93.1034	100	78.9474	96.4912	24.4404	10.6473	31.7504	-28.7094	86	83	-3	89.4737	76.1905	80	92.3077	-0.975516	25.5909	82.3529	82.3529	87.5	90.1961	2.69608	2.69608	3.67159	-22.8948	87	68	-19	94.4444	81.1111	76.4706	95.082	-4.003	31.9447	87.3016
34	21	21	1	2	GA	1	2.326	3.43	91.6667	95.8333	90.9091	98.5294	11.787	3.45365	72	96.4286	69.7674	92.4528	47.114	-1.74318	35.327	-5.19684	91	81	-10	80	88.4615	77.1429	94.2029	25.5216	8.5985	100	96.6667	81.8182	94.3662	9.21468	15.8813	-16.3069	7.28285	96	102	6	86.3636	83.8235	92	96.3504	18.1632	6.89047	82.9268
17	22	12	1	3	GA	1	1.511	1.998	80.9524	79.1667	70.5882	67.3077	-5.06626	-1.49483	75	75	56.3636	88.0952	31.7316	31.7316	36.7979	33.2264	76	62	-14	76.6667	87.5	71.6981	94.1176	33.2529	11.5862	77.7778	90	69.0476	84.2857	27.4603	3.01587	-5.79255	-8.57033	67	91	24	78.4314	71.1538	82.5	80.5825	13.4973	5.36005	76
31	20	21	4	1	GA	1	3.129	4.416	60.8696	51.5152	56.4103	55.5556	-10.2091	8.49971	59.0909	62.8571	48.7179	73.4694	28.5177	20.9852	38.7268	12.4855	87	83	-4	75	52.1739	60.4167	58.7302	-24.5126	21.1396	68.4211	65.5172	62.5	79.6296	14.2258	20.0334	38.7384	-1.10614	86	84	-2	66.6667	58.6207	51.7857	57.265	-16.2367	13.5252	63.4146
24	23	21	4	2	GA	1	5.829	3.303	83.3333	80	76.7442	86.2069	6.12938	12.796	56.5217	80.7692	52	81.6327	53.8801	5.38516	47.7508	-7.41088	88	75	-13	64.7059	40	50	76.6667	1.96078	51.3725	64.7059	63.3333	51.0638	73.2143	20.7779	23.523	18.8171	-27.8495	84	87	3	74.2857	62.6374	61.8182	81.3559	6.25104	31.1861	60
25	29	12	3	4	GA	1	6.028	7.321	84	95	86.2745	88.2353	12.9608	-9.03922	73.6842	100	63.2653	98.2759	61.3263	8.69477	48.3656	17.734	71	80	9	94.4444	96.4286	81.8182	91.6667	11.8326	7.86436	81.8182	95.8333	64.5833	96.4286	45.8604	17.8301	34.0278	9.96573	88	81	-7	88.3721	84.2105	95.8333	90.0901	13.3408	-1.58168	78.0488
[truncated: 10 more columns]
